# Supplementary material for: Hybridization interactions between probesets in short oligo microarrays lead to spurious correlations
Source: Springer Nature journal article supplement (doi:10.1186/1471-2105-7-276), 2006-06-02

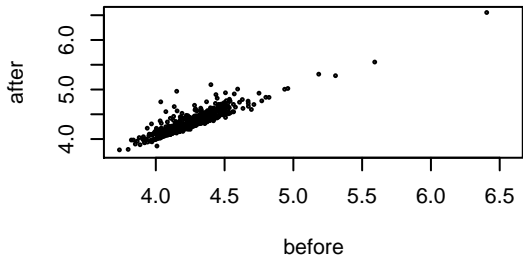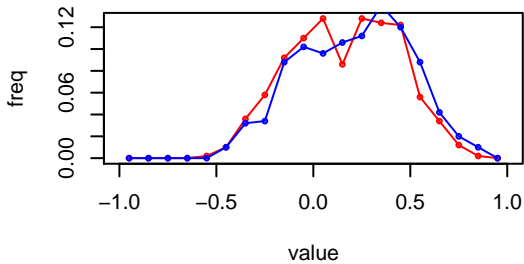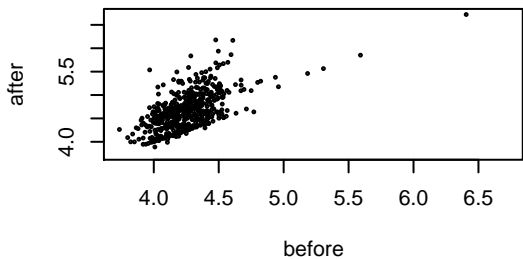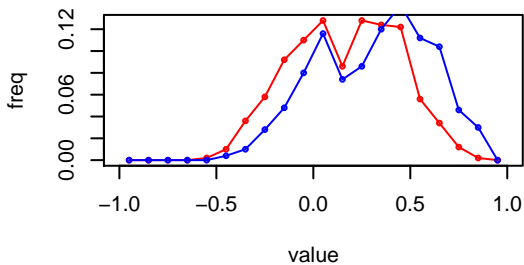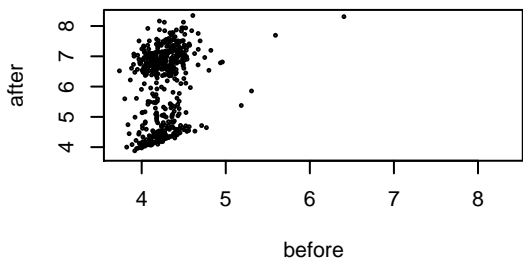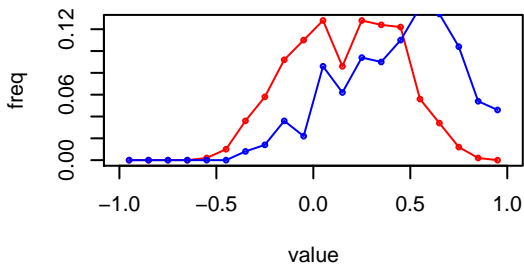

Supplement: 12859_2006_1015_MOESM8_ESM.pdf [file 12859_2006_1015_MOESM8_ESM.pdf]
